# Supplementary material for: Molecular Evaluation of the Effects of FLC Homologs and Coordinating Regulators on the Flowering Responses to Vernalization in Cabbage (Brassica oleracea var. capitata) Genotypes
Source: MDPI journal article supplement (doi:10.3390/genes15020154), 2024-01-24
Supplement: s1 [file s1]

**Table S1.** List of cabbage, kohlrabi, and broccoli materials used in this study with their flowering time.

| Species                                         | Common name | Genotype name | Flowering type |
|-------------------------------------------------|-------------|---------------|----------------|
| <i>B. oleracea</i> var. <i>capitata</i> (BOC)   | Cabbage     | 20FLC-CAB1    | Early          |
|                                                 |             | 20FLC-CAB3    | Medium         |
|                                                 |             | 20FLC-CAB5    | Late           |
| <i>B. oleracea</i> var. <i>gongylodes</i> (BOG) | Kohlrabi    | 20FLC-KH7     | Late           |
|                                                 |             | 20FLC-KH8     | Early          |
| <i>B. oleracea</i> var. <i>italica</i> (BOI)    | Broccoli    | 20FLC-BR10    | Early          |
|                                                 |             | 20FLC-BR11    | Late           |

**Table S2.** List of primers used in this molecular assessment of this study.

| Purpose                      | Gene identification no. | Gene name        | Forward primer      | Sequence (5'-3')           | Reverse primer      | Sequence (5'-3')          |
|------------------------------|-------------------------|------------------|---------------------|----------------------------|---------------------|---------------------------|
| Genomic DNA cloning          | <i>Bo9g173400</i>       | <i>BoFLC1</i>    | <i>BoFLC1</i> -gF   | AGATCAAATTAGGGCGCAAAGC     | <i>BoFLC1</i> -gR   | ATTCGCCGATTAAAGGTAAC      |
|                              | <i>Bo3g100540</i>       | <i>BoFLC2</i>    | <i>BoFLC2</i> -gF   | ACCGAACCGAACCTCAGGATC      | <i>BoFLC2</i> -gR   | GTAGTTTTTACACACGGGGTC     |
|                              | <i>Bo3g005470</i>       | <i>BoFLC3</i>    | <i>BoFLC3</i> -gF   | CACTTGAACCGAACCTCTGG       | <i>BoFLC3</i> -gR   | ATTCAGCCCCGTCTAAAGG       |
| Genomic DNA cloning (Contig) | <i>Bo9g173400</i>       | <i>BoFLC1</i>    | <i>BoFLC1</i> -F1   | CGCTGTGAGGTTGATGCT         | <i>BoFLC1</i> -R1   | AGCATCAACCTCACAGCG        |
|                              |                         |                  | <i>BoFLC1</i> -F2   | CCAAGCGTTTAGTTTCGC         | <i>BoFLC1</i> -R2   | GCGAAACTAAACGCTTGG        |
|                              |                         |                  | <i>BoFLC1</i> -F3   | ACGATTGCGTTTGCATGT         | <i>BoFLC1</i> -R3   | ACATGCAAACGCAATCGT        |
|                              |                         |                  | <i>BoFLC1</i> -F4   | ATGTATTGGCATGCCCGC         | <i>BoFLC1</i> -R4   | GCGGGCATGCCAATACAT        |
|                              |                         |                  | <i>BoFLC1</i> -F5   | AGTCTGCTTCATGAGGCC         | <i>BoFLC1</i> -R5   | GGCCTCATGAAGCAGACT        |
|                              | <i>Bo3g100540</i>       | <i>BoFLC2</i>    | <i>BoFLC2</i> -F1   | GAGCAATGTCTGATGAGC         | <i>BoFLC2</i> -R1   | GCTCATCAGGACATTGCTC       |
|                              |                         |                  | <i>BoFLC2</i> -F2   | ATTGTGCAGCCATTAAACC        | <i>BoFLC2</i> -R2   | GGTTAATGGCTGCACAAT        |
|                              |                         |                  | <i>BoFLC2</i> -F3   | TGGTTCACACCATGAGCTAC       | <i>BoFLC2</i> -R3   | GTAGCTCATGGTGTGAACCA      |
|                              |                         |                  | <i>BoFLC2</i> -F4   | GAACCAGGGTTTGGCTAG         | <i>BoFLC2</i> -R4   | CTAGCCAAACCTTGGTTC        |
|                              |                         |                  | <i>BoFLC2</i> -F5   | AATGAAGCCTGGATCTGG         | <i>BoFLC2</i> -R5   | CCAGATCCAGGCTTCATT        |
|                              | <i>Bo3g005470</i>       | <i>BoFLC3</i>    | <i>BoFLC3</i> -F1   | TTTGCATGTCCGTCAAGA         | <i>BoFLC3</i> -R1   | TCTTGACGACATGCAAA         |
|                              |                         |                  | <i>BoFLC3</i> -F2   | AGGAACAAGCATTCCTTTTC       | <i>BoFLC3</i> -R2   | GAAAAGGAATGCTTGTTCCT      |
|                              |                         |                  | <i>BoFLC3</i> -F3   | GCCAACTCATAGCCTCAA         | <i>BoFLC3</i> -R3   | TTGAGGCTATGAGTTGGC        |
|                              |                         |                  | <i>BoFLC3</i> -F4   | TGGAGGGTGTCTTGAGA          | <i>BoFLC3</i> -R4   | TCTCAAGGACACCCTCCA        |
|                              |                         |                  | <i>BoFLC3</i> -F5   | GAAGAAGAAACAACCAAGGC       | <i>BoFLC3</i> -R5   | GCCTTGTTGTTTCTTCTTC       |
| Expression analysis          | <i>Bo9g173400</i>       | <i>BoFLC1</i>    | <i>BoFLC1</i> -F    | CGATAATGTAAGTGTGGGTTC      | <i>BoFLC1</i> -R    | GGAGATTTGTCCAGGTGACACC    |
|                              | <i>Bo3g100540</i>       | <i>BoFLC2</i>    | <i>BoFLC2</i> -F    | TCTGATGTAAGCGTCGATTCC      | <i>BoFLC2</i> -R    | CGGACAATTGATGTCAGAGATC    |
|                              | <i>Bo3g005470</i>       | <i>BoFLC3</i>    | <i>BoFLC3</i> -F    | GAGCTATGGTTCACACAATGAGTTAC | <i>BoFLC3</i> -R    | GGCTATCAACAAGCTTCAACATTAG |
|                              | <i>Bo5g038860</i>       | <i>BoGI</i>      | <i>BoGI</i> -F      | TGGCAAAGTGCATCTGATCTC      | <i>BoGI</i> -R      | TGGGTGTGATAAGCACCGTA      |
|                              | <i>Bo9g173400</i>       | <i>BoCOOLAIR</i> | <i>BoCOOLAIR</i> -F | TGATGGTTGGTAGGAAAAGA       | <i>BoCOOLAIR</i> -R | CCGCAAGATTATTCTTCTCCA     |
|                              | <i>Bo3g019340</i>       | <i>BoVIN3</i>    | <i>BoVIN3</i> -F    | TGGATTGCTTGTGAGGGTTGT      | <i>BoVIN3</i> -R    | TACATGCCGAGTCTCCTTCG      |
|                              | <i>Bo1030974</i>        | <i>BoACTIN1</i>  | <i>BoACTIN1</i> -F  | TTCTCTCTCCACACGCCAT        | <i>BoACTIN1</i> -R  | CTTGTCCTGCGGGTAATTCG      |

**Table S3.** Percent identity matrix of CDS multiple sequence alignment cabbages (*FLC1*-CAB1, -CAB3, and -CAB5), kohlrabi (*FLC2*-KH7 and -KH8), and broccoli (*FLC3*-BR10 and -BR11) having different flowering times.

[illegible]
